# Supplementary material for: Physiological and Transcriptome Analysis of the Effects of Exogenous Strigolactones on Drought Responses of Pepper Seedlings
Source: MDPI journal article supplement (doi:10.3390/antiox12122019), 2023-11-21
Supplement: s1 [file s1]

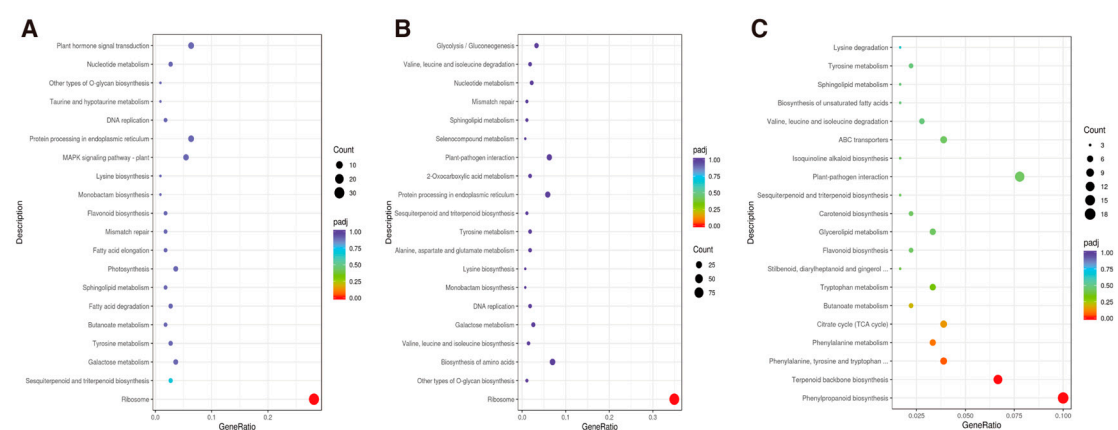

**Figure S1.** KEGG enrichment analysis. (A) DS vs control, (B) DS+SL vs control, and (C) DS+SL vs DS.

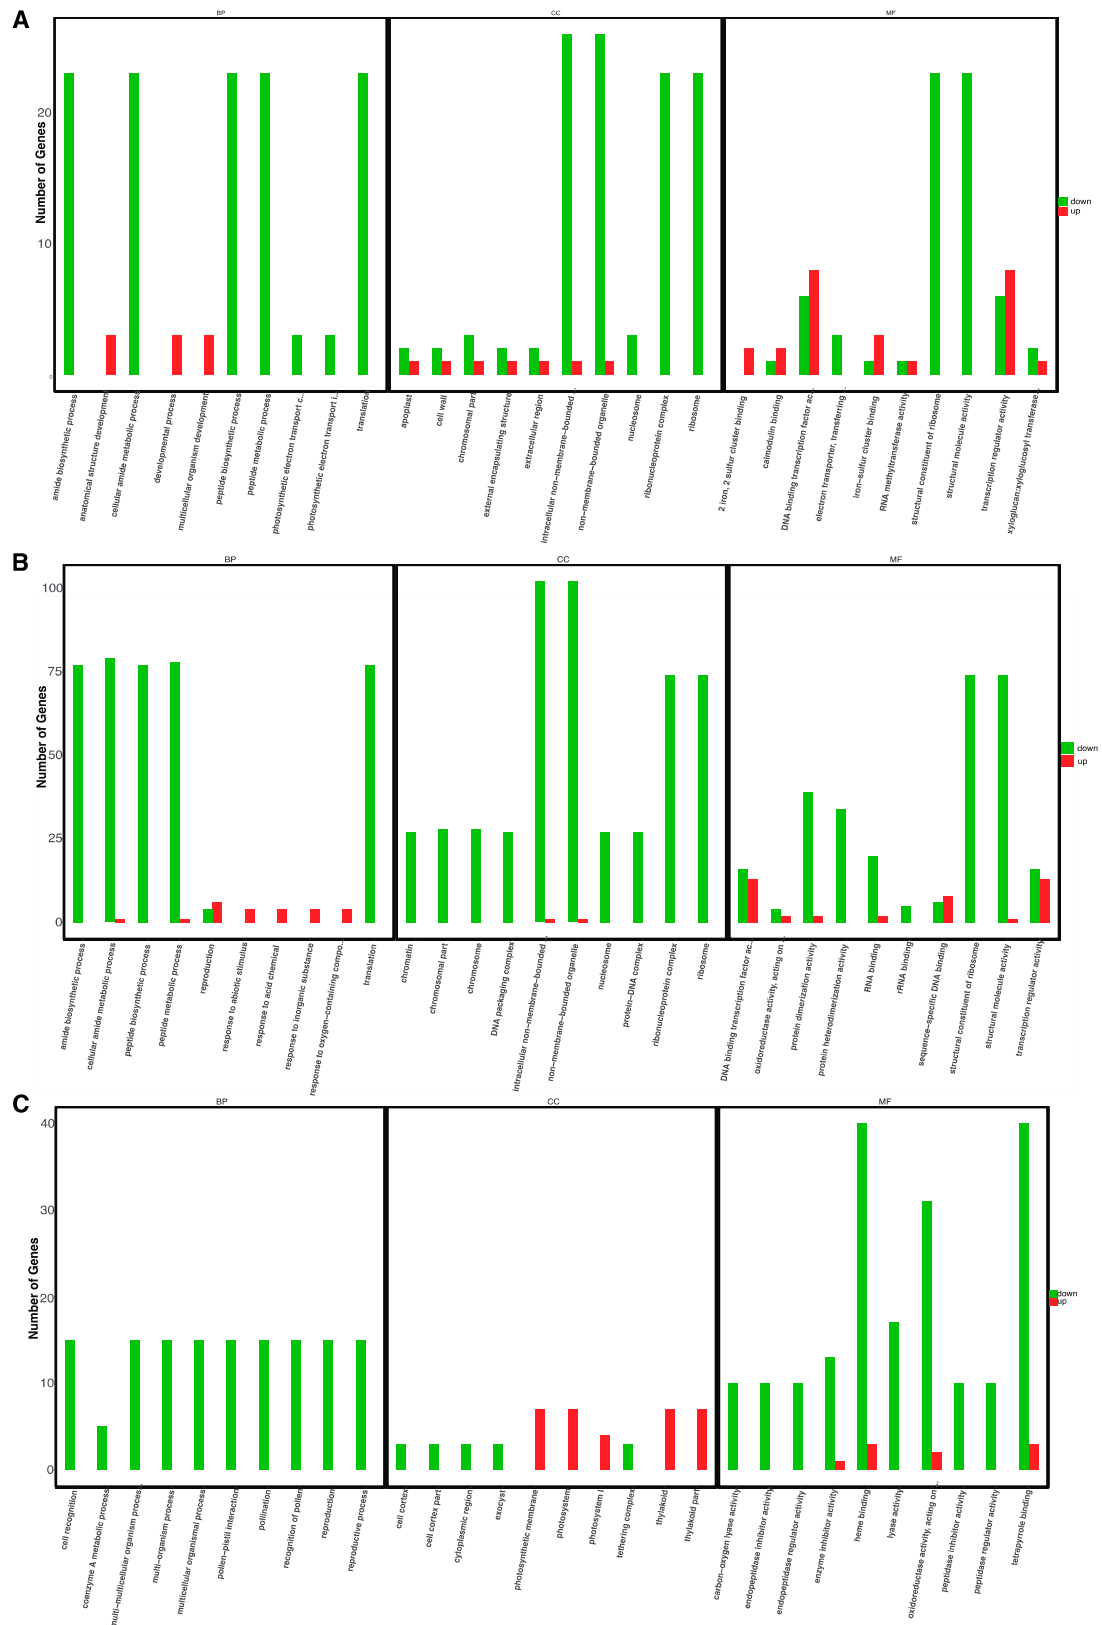

**Figure S2.** GO enrichment analysis. (A) DS vs control, (B) DS+SL vs control, and (C) DS+SL vs DS.

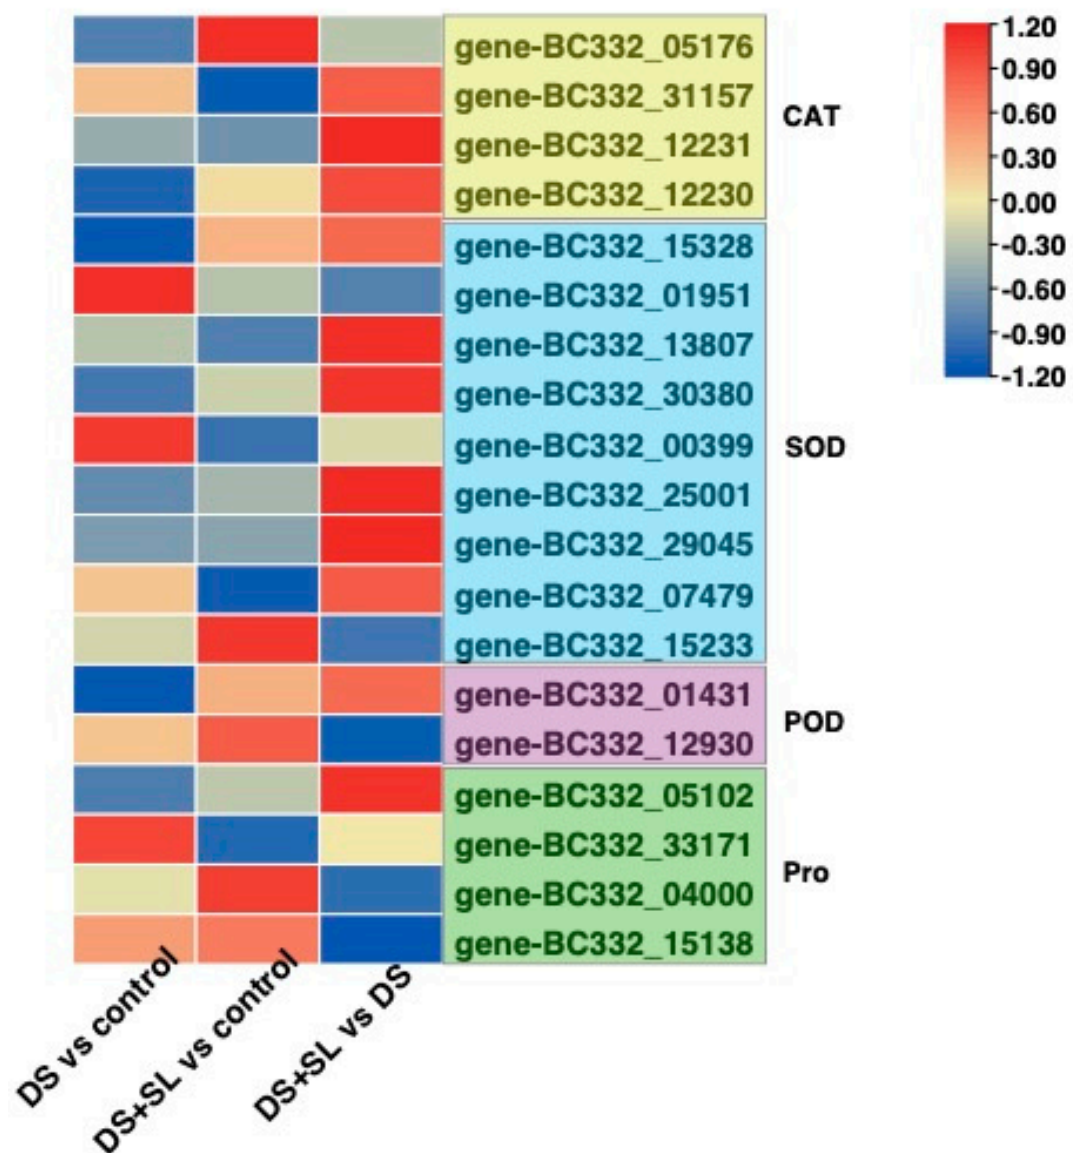

**Figure S3.** Heat-map representing the transcription level of differentially expressed proline and antioxidant enzymes related genes in pepper seedlings under drought stress. Heatmap colors show the log2FoldChange values.
